# Supplementary material for: Expression Profiling of a Genetic Animal Model of Depression Reveals Novel Molecular Pathways Underlying Depressive-Like Behaviours
Source: PubMed Central journal article supplement (PMC2935375; doi:10.1371/journal.pone.0012596), 2010-09-07
Supplement: pone.0012596.s001.pdf [file pone.0012596.s001.pdf]

| Affy ID    | Gene Name            | Fold Change<br>FSL vs FRL<br>combined<br>PFC | p-value FSL<br>vs FRL<br>combined<br>PFC | Fold Change<br>FSL vs FRL<br>cohort 1<br>PFC | p-value FSL<br>vs FRL<br>cohort 1<br>PFC | Fold Change<br>FSL vs FRL<br>cohort 2<br>PFC | p-value FSL<br>vs FRL<br>cohort 2<br>PFC | Fold Change<br>FSL vs FRL<br>combined<br>HIP | p-value FSL<br>vs FRL<br>combined<br>HIP | Fold Change<br>FSL vs FRL<br>cohort 1<br>HIP | p-value FSL<br>vs FRL<br>cohort 1<br>HIP | Fold Change<br>FSL vs FRL<br>cohort 2<br>HIP | p-value FSL<br>vs FRL<br>cohort 2<br>HIP |
|------------|----------------------|----------------------------------------------|------------------------------------------|----------------------------------------------|------------------------------------------|----------------------------------------------|------------------------------------------|----------------------------------------------|------------------------------------------|----------------------------------------------|------------------------------------------|----------------------------------------------|------------------------------------------|
| 1372923_at | Pex11b               | 2.6                                          | 2.8E-11                                  | 2.7                                          | 1.4E-08                                  | 2.4                                          | 5.1E-07                                  | 2.5                                          | 1.9E-10                                  | 2.8                                          | 2.5E-08                                  | 2.3                                          | 6.4E-06                                  |
| 1385871_at | AA859982             | 2.4                                          | 5.7E-18                                  | 2.5                                          | 2.9E-15                                  | 2.2                                          | 1.7E-12                                  | 2.2                                          | 1.8E-17                                  | 2.0                                          | 2.3E-12                                  | 2.4                                          | 4.2E-14                                  |
| 1383058_at | 1383058_at           | 2.3                                          | 2.0E-19                                  | 2.5                                          | 2.0E-16                                  | 2.1                                          | 5.3E-13                                  | 2.5                                          | 4.9E-27                                  | 2.5                                          | 2.5E-22                                  | 2.5                                          | 1.1E-21                                  |
| 1382755_at | AI137236             | 2.2                                          | 4.2E-14                                  | 2.3                                          | 1.8E-11                                  | 2.0                                          | 2.6E-09                                  | 2.3                                          | 2.5E-18                                  | 2.2                                          | 1.5E-13                                  | 2.4                                          | 4.0E-14                                  |
| 1380507_at | 1380507_at           | 2.2                                          | 2.4E-09                                  | 2.1                                          | 2.4E-06                                  | 2.2                                          | 2.4E-06                                  | 2.1                                          | 2.9E-09                                  | 1.9                                          | 6.6E-06                                  | 2.2                                          | 7.6E-07                                  |
| 1396743_at | 1396743_at           | 2.1                                          | 2.4E-09                                  | 2.6                                          | 2.7E-08                                  | 1.8                                          | 2.9E-04                                  | 2.0                                          | 1.7E-09                                  | 2.5                                          | 5.1E-09                                  | 1.6                                          | 8.1E-04                                  |
| 1393410_at | Cntnap2_predicted    | 2.0                                          | 2.9E-08                                  | 2.0                                          | 7.9E-06                                  | 2.0                                          | 1.7E-05                                  | 1.6                                          | 1.7E-05                                  | 1.6                                          | 1.3E-03                                  | 1.7                                          | 1.1E-03                                  |
| 1380651_at | Rnf6_predicted       | 2.0                                          | 5.8E-08                                  | 1.6                                          | 1.3E-03                                  | 2.4                                          | 3.1E-07                                  | 1.7                                          | 5.0E-06                                  | 1.7                                          | 5.8E-04                                  | 1.8                                          | 4.2E-04                                  |
| 1379571_at | Pkp4_predicted       | 1.9                                          | 2.4E-06                                  | 2.1                                          | 5.1E-05                                  | 1.7                                          | 1.8E-03                                  | 2.0                                          | 1.6E-06                                  | 2.0                                          | 1.5E-04                                  | 2.0                                          | 3.7E-04                                  |
| 1394477_at | 1394477_at           | 1.8                                          | 9.2E-10                                  | 1.8                                          | 1.1E-06                                  | 1.9                                          | 1.3E-06                                  | 1.7                                          | 8.7E-09                                  | 1.6                                          | 1.1E-05                                  | 1.7                                          | 3.4E-06                                  |
| 1369962_at | Atic                 | 1.8                                          | 1.5E-08                                  | 2.0                                          | 4.5E-07                                  | 1.6                                          | 1.4E-04                                  | 1.7                                          | 2.4E-07                                  | 1.8                                          | 1.2E-05                                  | 1.6                                          | 3.0E-04                                  |
| 1380900_at | 1380900_at           | 1.8                                          | 3.1E-14                                  | 1.9                                          | 2.3E-11                                  | 1.8                                          | 1.3E-09                                  | 1.8                                          | 2.5E-17                                  | 1.8                                          | 8.3E-14                                  | 1.8                                          | 2.9E-12                                  |
| 1376745_at | mss4                 | 1.8                                          | 2.3E-17                                  | 1.7                                          | 9.0E-13                                  | 1.9                                          | 8.0E-14                                  | 1.7                                          | 2.4E-16                                  | 1.5                                          | 1.8E-09                                  | 2.0                                          | 4.8E-15                                  |
| 1385035_at | Usp12_predicted      | 1.8                                          | 7.9E-06                                  | 1.5                                          | 7.6E-03                                  | 2.1                                          | 4.7E-05                                  | 1.8                                          | 6.3E-07                                  | 1.7                                          | 2.4E-04                                  | 1.9                                          | 5.6E-05                                  |
| 1383298_at | RGD1310444_predicted | 1.7                                          | 3.5E-08                                  | 1.9                                          | 1.3E-06                                  | 1.6                                          | 1.7E-04                                  | 1.9                                          | 4.2E-08                                  | 1.6                                          | 1.6E-04                                  | 2.1                                          | 1.4E-06                                  |
| 1390605_at | Cdh11                | 1.7                                          | 1.4E-08                                  | 1.4                                          | 8.8E-04                                  | 2.0                                          | 5.3E-08                                  | 1.7                                          | 3.7E-11                                  | 1.5                                          | 2.3E-06                                  | 1.9                                          | 3.0E-09                                  |
| 1397516_at | Alg2_predicted       | 1.7                                          | 2.2E-05                                  | 1.7                                          | 8.6E-04                                  | 1.7                                          | 1.9E-03                                  | 1.4                                          | 1.0E-04                                  | 1.3                                          | 9.9E-03                                  | 1.5                                          | 1.1E-03                                  |
| 1369773_at | Bmp3                 | 1.6                                          | 1.6E-05                                  | 1.6                                          | 1.2E-03                                  | 1.7                                          | 8.3E-04                                  | 1.8                                          | 1.1E-06                                  | 2.1                                          | 4.1E-06                                  | 1.5                                          | 8.0E-03                                  |
| 1391564_at | LOC363022            | 1.6                                          | 5.3E-08                                  | 1.6                                          | 2.9E-05                                  | 1.7                                          | 1.1E-05                                  | 1.4                                          | 1.1E-05                                  | 1.4                                          | 8.4E-04                                  | 1.5                                          | 7.8E-04                                  |
| 1368379_at | Scarb2               | 1.6                                          | 5.6E-07                                  | 1.5                                          | 3.3E-04                                  | 1.7                                          | 3.2E-05                                  | 1.5                                          | 2.6E-07                                  | 1.6                                          | 8.3E-06                                  | 1.4                                          | 5.0E-04                                  |
| 1377422_at | Mtmr1_predicted      | 1.6                                          | 2.3E-05                                  | 1.6                                          | 9.2E-04                                  | 1.6                                          | 2.4E-03                                  | 1.5                                          | 1.5E-06                                  | 1.5                                          | 7.8E-05                                  | 1.4                                          | 7.8E-04                                  |
| 1377424_at | Dutp                 | 1.6                                          | 4.4E-08                                  | 1.6                                          | 9.7E-06                                  | 1.6                                          | 4.5E-05                                  | 1.4                                          | 2.6E-05                                  | 1.4                                          | 4.8E-03                                  | 1.5                                          | 4.4E-04                                  |
| 1394693_at | GB:AB014881          | 1.6                                          | 9.1E-07                                  | 1.8                                          | 3.1E-06                                  | 1.4                                          | 8.8E-03                                  | 1.5                                          | 1.1E-06                                  | 1.6                                          | 5.7E-06                                  | 1.3                                          | 6.6E-03                                  |
| 1392171_at | Chi3r1               | 1.6                                          | 1.2E-09                                  | 1.7                                          | 3.6E-08                                  | 1.4                                          | 7.4E-05                                  | 1.7                                          | 2.3E-15                                  | 1.6                                          | 7.5E-11                                  | 1.7                                          | 7.7E-12                                  |
| 1384783_at | RGD:628712           | 1.6                                          | 4.7E-07                                  | 1.7                                          | 6.7E-06                                  | 1.4                                          | 1.4E-03                                  | 1.5                                          | 3.3E-07                                  | 1.6                                          | 5.0E-06                                  | 1.4                                          | 1.3E-03                                  |
| 1393716_at | LOC502421            | 1.5                                          | 8.5E-11                                  | 1.7                                          | 2.0E-09                                  | 1.4                                          | 1.2E-05                                  | 1.3                                          | 2.2E-05                                  | 1.3                                          | 9.3E-04                                  | 1.2                                          | 2.2E-03                                  |
| 1380164_at | Tk2_predicted        | 1.5                                          | 3.0E-07                                  | 1.5                                          | 1.4E-04                                  | 1.6                                          | 2.8E-05                                  | 1.5                                          | 2.8E-08                                  | 1.5                                          | 3.7E-06                                  | 1.4                                          | 5.4E-05                                  |
| 1371749_at | RGD1306001_predicted | 1.5                                          | 5.7E-10                                  | 1.6                                          | 2.7E-08                                  | 1.4                                          | 3.3E-05                                  | 1.5                                          | 6.3E-09                                  | 1.5                                          | 1.2E-06                                  | 1.5                                          | 2.3E-05                                  |
| 1393783_at | Cntnap2_predicted    | 1.5                                          | 1.6E-07                                  | 1.6                                          | 2.0E-06                                  | 1.4                                          | 1.1E-03                                  | 1.3                                          | 1.3E-04                                  | 1.3                                          | 5.5E-03                                  | 1.3                                          | 3.4E-03                                  |
| 1398382_at | Mak3_predicted       | 1.5                                          | 1.4E-06                                  | 1.5                                          | 6.7E-05                                  | 1.5                                          | 6.7E-04                                  | 1.4                                          | 8.8E-06                                  | 1.4                                          | 9.7E-04                                  | 1.4                                          | 5.9E-04                                  |
| 1368883_at | Nov                  | 1.5                                          | 1.6E-07                                  | 1.5                                          | 2.3E-05                                  | 1.5                                          | 9.2E-05                                  | 1.5                                          | 3.6E-06                                  | 1.5                                          | 4.1E-04                                  | 1.5                                          | 4.7E-04                                  |
| 1395453_at | LOC362398            | 1.5                                          | 1.7E-05                                  | 1.4                                          | 3.0E-03                                  | 1.5                                          | 3.8E-04                                  | 1.3                                          | 6.3E-06                                  | 1.2                                          | 6.0E-03                                  | 1.5                                          | 4.1E-05                                  |
| 1381906_at | Tpd52_predicted      | 1.5                                          | 1.3E-07                                  | 1.4                                          | 3.4E-04                                  | 1.6                                          | 4.6E-06                                  | 1.4                                          | 8.0E-06                                  | 1.3                                          | 3.6E-03                                  | 1.6                                          | 1.1E-04                                  |
| 1372647_at | Prep                 | 1.5                                          | 1.7E-08                                  | 1.6                                          | 7.9E-08                                  | 1.3                                          | 1.6E-03                                  | 1.6                                          | 7.6E-11                                  | 1.7                                          | 1.3E-08                                  | 1.5                                          | 2.9E-06                                  |
