# Supplementary material for: Expression Profiling of a Genetic Animal Model of Depression Reveals Novel Molecular Pathways Underlying Depressive-Like Behaviours
Source: PubMed Central journal article supplement (PMC2935375; doi:10.1371/journal.pone.0012596), 2010-09-07
Supplement: pone.0012596.s002.pdf [file pone.0012596.s002.pdf]

| Affy ID      | Gene Name            | Fold Change<br>FSL vs FRL<br>combined<br>PFC | p-value FSL<br>vs FRL<br>combined<br>PFC | Fold Change<br>FSL vs FRL<br>cohort 1<br>PFC | p-value FSL<br>vs FRL<br>cohort 1<br>PFC | Fold Change<br>FSL vs FRL<br>cohort 2<br>PFC | p-value FSL<br>vs FRL<br>cohort 2<br>PFC | Fold Change<br>FSL vs FRL<br>combined<br>HIP | p-value FSL<br>vs FRL<br>combined<br>HIP | Fold Change<br>FSL vs FRL<br>cohort 1<br>HIP | p-value FSL<br>vs FRL<br>cohort 1<br>HIP | Fold Change<br>FSL vs FRL<br>cohort 2<br>HIP | p-value FSL<br>vs FRL<br>cohort 2<br>HIP |
|--------------|----------------------|----------------------------------------------|------------------------------------------|----------------------------------------------|------------------------------------------|----------------------------------------------|------------------------------------------|----------------------------------------------|------------------------------------------|----------------------------------------------|------------------------------------------|----------------------------------------------|------------------------------------------|
| 1371970_at   | FAM111A              | -5.4                                         | <b>2.21E-10</b>                          | -8.1                                         | <b>2.94E-09</b>                          | -3.6                                         | <b>8.64E-05</b>                          | -3.9                                         | <b>2.46E-10</b>                          | -5.1                                         | <b>6.21E-09</b>                          | -2.9                                         | <b>4.47E-05</b>                          |
| 1371475_at   | RNase4               | -4.7                                         | <b>1.89E-06</b>                          | -4.1                                         | <b>4.83E-04</b>                          | -5.4                                         | <b>1.56E-04</b>                          | -3.3                                         | <b>2.56E-07</b>                          | -3.1                                         | <b>1.11E-04</b>                          | -3.6                                         | <b>4.14E-05</b>                          |
| 1367896_at   | CA3                  | -4.5                                         | <b>4.10E-09</b>                          | -3.6                                         | <b>2.17E-05</b>                          | -5.7                                         | <b>5.26E-07</b>                          | -4.2                                         | <b>3.23E-10</b>                          | -3.8                                         | <b>1.10E-06</b>                          | -4.7                                         | <b>2.44E-07</b>                          |
| 1371349_at   | RGD1565398_predicted | -4.4                                         | <b>3.48E-18</b>                          | -4.9                                         | <b>2.83E-15</b>                          | -3.9                                         | <b>8.02E-13</b>                          | -2.2                                         | <b>4.49E-22</b>                          | -2.2                                         | <b>2.16E-17</b>                          | -2.3                                         | <b>2.67E-17</b>                          |
| 1387366_at   | ILF3                 | -3.7                                         | <b>2.23E-25</b>                          | -4.1                                         | <b>2.12E-22</b>                          | -3.4                                         | <b>1.99E-19</b>                          | -4.3                                         | <b>9.99E-26</b>                          | -4.7                                         | <b>3.48E-22</b>                          | -4.0                                         | <b>6.34E-20</b>                          |
| 1391985_at   | Nrip3_predicted      | -3.7                                         | <b>9.19E-13</b>                          | -3.8                                         | <b>1.93E-09</b>                          | -3.7                                         | <b>1.43E-08</b>                          | -6.0                                         | <b>1.34E-15</b>                          | -6.1                                         | <b>7.07E-12</b>                          | -6.0                                         | <b>4.11E-11</b>                          |
| 1368943_at   | Rnase4               | -3.4                                         | <b>7.19E-07</b>                          | -2.8                                         | <b>6.44E-04</b>                          | -4.1                                         | <b>2.80E-05</b>                          | -2.6                                         | <b>7.76E-08</b>                          | -2.5                                         | <b>3.86E-05</b>                          | -2.7                                         | <b>2.39E-05</b>                          |
| 1383393_at   | RGD1309786_predicted | -3.2                                         | <b>3.87E-13</b>                          | -3.4                                         | <b>3.39E-10</b>                          | -3.1                                         | <b>7.59E-09</b>                          | -3.9                                         | <b>1.48E-12</b>                          | -3.3                                         | <b>3.69E-08</b>                          | -4.5                                         | <b>1.07E-09</b>                          |
| 1386977_at   | CA3                  | -2.8                                         | <b>1.63E-09</b>                          | -2.7                                         | <b>1.28E-06</b>                          | -2.8                                         | <b>2.63E-06</b>                          | -2.8                                         | <b>4.35E-10</b>                          | -2.8                                         | <b>4.76E-07</b>                          | -2.9                                         | <b>7.89E-07</b>                          |
| 1392736_at   | 1392736_at           | -2.7                                         | <b>1.09E-14</b>                          | -2.9                                         | <b>5.83E-12</b>                          | -2.5                                         | <b>7.05E-10</b>                          | -2.9                                         | <b>5.72E-13</b>                          | -2.9                                         | <b>7.04E-10</b>                          | -2.8                                         | <b>1.15E-08</b>                          |
| 1380094_a_at | Zfp212_predicted     | -2.7                                         | <b>5.97E-18</b>                          | -3.2                                         | <b>8.63E-16</b>                          | -2.2                                         | <b>1.02E-10</b>                          | -2.7                                         | <b>2.54E-24</b>                          | -3.0                                         | <b>1.88E-21</b>                          | -2.3                                         | <b>6.18E-17</b>                          |
| 1369663_at   | Ephx2                | -2.6                                         | <b>6.52E-13</b>                          | -2.4                                         | <b>1.22E-08</b>                          | -2.9                                         | <b>1.11E-09</b>                          | -3.4                                         | <b>8.12E-13</b>                          | -4.0                                         | <b>1.46E-10</b>                          | -2.9                                         | <b>2.18E-07</b>                          |
| 1375958_at   | 1375958_at           | -2.5                                         | <b>3.80E-09</b>                          | -2.2                                         | <b>1.68E-05</b>                          | -2.9                                         | <b>3.87E-07</b>                          | -2.5                                         | <b>5.16E-11</b>                          | -2.0                                         | <b>6.94E-06</b>                          | -3.1                                         | <b>1.68E-09</b>                          |
| 1377061_at   | RICS_predicted       | -2.4                                         | <b>1.39E-12</b>                          | -3.0                                         | <b>2.52E-11</b>                          | -2.0                                         | <b>4.71E-06</b>                          | -2.6                                         | <b>3.16E-10</b>                          | -2.9                                         | <b>3.66E-08</b>                          | -2.4                                         | <b>9.42E-06</b>                          |
| 1360577_at   | Abcg2                | -2.3                                         | <b>2.19E-10</b>                          | -2.1                                         | <b>1.10E-06</b>                          | -2.4                                         | <b>1.31E-07</b>                          | -2.0                                         | <b>2.35E-09</b>                          | -1.7                                         | <b>4.46E-05</b>                          | -2.3                                         | <b>9.38E-08</b>                          |
| 1370995_at   | Pou2f1               | -2.2                                         | <b>2.22E-08</b>                          | -2.0                                         | <b>3.55E-05</b>                          | -2.4                                         | <b>4.04E-06</b>                          | -1.9                                         | <b>5.71E-09</b>                          | -1.8                                         | <b>2.06E-05</b>                          | -2.1                                         | <b>9.24E-07</b>                          |
| 1396344_at   | 1396344_at           | -2.2                                         | <b>3.45E-09</b>                          | -2.1                                         | <b>4.27E-06</b>                          | -2.3                                         | <b>2.32E-06</b>                          | -2.5                                         | <b>1.06E-12</b>                          | -2.5                                         | <b>3.18E-09</b>                          | -2.6                                         | <b>1.06E-08</b>                          |
| 1396846_at   | Grik2                | -2.2                                         | <b>4.24E-13</b>                          | -1.9                                         | <b>2.08E-08</b>                          | -2.4                                         | <b>1.18E-10</b>                          | -3.3                                         | <b>2.45E-13</b>                          | -3.0                                         | <b>2.69E-09</b>                          | -3.6                                         | <b>4.47E-10</b>                          |
| 1389275_at   | Sh3bp1_predicted     | -2.1                                         | <b>7.59E-10</b>                          | -1.6                                         | <b>2.19E-04</b>                          | -2.7                                         | <b>3.36E-09</b>                          | -1.6                                         | <b>1.12E-09</b>                          | -1.6                                         | <b>2.01E-06</b>                          | -1.7                                         | <b>4.89E-07</b>                          |
| 1380332_at   | 1380332_at           | -2.1                                         | <b>6.87E-09</b>                          | -2.2                                         | <b>8.67E-07</b>                          | -1.9                                         | <b>3.68E-05</b>                          | -2.1                                         | <b>5.65E-11</b>                          | -2.3                                         | <b>8.22E-09</b>                          | -1.9                                         | <b>2.78E-06</b>                          |
| 1393302_at   | TMEM176A             | -2.0                                         | <b>4.17E-12</b>                          | -2.2                                         | <b>6.86E-10</b>                          | -1.9                                         | <b>6.27E-07</b>                          | -3.4                                         | <b>2.71E-13</b>                          | -3.6                                         | <b>3.15E-10</b>                          | -3.2                                         | <b>1.29E-08</b>                          |
| 1386855_at   | GB_AA900968          | -2.0                                         | <b>2.92E-06</b>                          | -1.8                                         | <b>1.32E-03</b>                          | -2.2                                         | <b>9.28E-05</b>                          | -2.1                                         | <b>7.44E-06</b>                          | -2.2                                         | <b>3.10E-04</b>                          | -2.0                                         | <b>1.65E-03</b>                          |
| 1398445_at   | 1398445_at           | -2.0                                         | <b>2.10E-08</b>                          | -1.6                                         | <b>4.11E-04</b>                          | -2.5                                         | <b>1.35E-07</b>                          | -2.0                                         | <b>1.58E-09</b>                          | -1.7                                         | <b>7.70E-05</b>                          | -2.4                                         | <b>2.40E-08</b>                          |
| 1368826_at   | Comt                 | -2.0                                         | <b>6.02E-06</b>                          | -1.8                                         | <b>2.31E-03</b>                          | -2.3                                         | <b>1.01E-04</b>                          | -1.9                                         | <b>5.78E-05</b>                          | -1.7                                         | <b>5.63E-03</b>                          | -2.1                                         | <b>1.05E-03</b>                          |
| 1373204_at   | TMEM176A             | -1.9                                         | <b>3.99E-12</b>                          | -1.9                                         | <b>7.91E-09</b>                          | -1.9                                         | <b>3.72E-08</b>                          | -1.6                                         | <b>9.91E-12</b>                          | -1.5                                         | <b>3.86E-08</b>                          | -1.6                                         | <b>1.72E-08</b>                          |
| 1376129_at   | GB_BF393567          | -1.9                                         | <b>5.36E-07</b>                          | -1.8                                         | <b>1.47E-04</b>                          | -1.9                                         | <b>7.19E-05</b>                          | -2.1                                         | <b>6.70E-09</b>                          | -2.3                                         | <b>3.42E-07</b>                          | -1.9                                         | <b>8.58E-05</b>                          |
| 1369149_at   | Limk1                | -1.9                                         | <b>1.80E-08</b>                          | -2.1                                         | <b>3.46E-07</b>                          | -1.6                                         | <b>2.47E-04</b>                          | -2.2                                         | <b>1.09E-08</b>                          | -1.8                                         | <b>1.91E-04</b>                          | -2.7                                         | <b>2.16E-07</b>                          |
| 1392381_at   | 1392381_at           | -1.8                                         | <b>5.91E-07</b>                          | -1.8                                         | <b>1.74E-04</b>                          | -1.9                                         | <b>9.05E-05</b>                          | -1.6                                         | <b>2.75E-05</b>                          | -1.4                                         | <b>8.75E-03</b>                          | -1.8                                         | <b>2.25E-04</b>                          |
| 1394160_at   | Tmem2_predicted      | -1.8                                         | <b>1.11E-08</b>                          | -2.0                                         | <b>4.24E-07</b>                          | -1.7                                         | <b>1.59E-04</b>                          | -1.8                                         | <b>1.19E-06</b>                          | -1.8                                         | <b>1.07E-04</b>                          | -1.8                                         | <b>4.08E-04</b>                          |
| 1388654_at   | Mrip52_predicted     | -1.8                                         | <b>1.85E-07</b>                          | -1.8                                         | <b>5.41E-05</b>                          | -1.9                                         | <b>4.44E-05</b>                          | -1.3                                         | <b>1.02E-04</b>                          | -1.3                                         | <b>2.50E-03</b>                          | -1.3                                         | <b>5.91E-03</b>                          |
| 1398255_at   | Slc15a2              | -1.8                                         | <b>6.44E-10</b>                          | -2.0                                         | <b>2.32E-08</b>                          | -1.6                                         | <b>2.35E-05</b>                          | -1.4                                         | <b>3.14E-06</b>                          | -1.3                                         | <b>9.16E-04</b>                          | -1.5                                         | <b>1.23E-04</b>                          |
| 1367811_at   | Phgdh                | -1.8                                         | <b>2.59E-10</b>                          | -1.7                                         | <b>4.87E-07</b>                          | -1.8                                         | <b>1.95E-07</b>                          | -1.8                                         | <b>2.92E-14</b>                          | -1.8                                         | <b>9.16E-11</b>                          | -1.8                                         | <b>9.79E-10</b>                          |
| 1370234_at   | Fn1                  | -1.8                                         | <b>1.26E-12</b>                          | -1.7                                         | <b>1.97E-08</b>                          | -1.9                                         | <b>2.00E-09</b>                          | -1.6                                         | <b>4.39E-11</b>                          | -1.4                                         | <b>1.27E-05</b>                          | -1.8                                         | <b>8.32E-10</b>                          |
| 1373571_at   | Rtn3                 | -1.8                                         | <b>8.58E-19</b>                          | -1.6                                         | <b>2.56E-13</b>                          | -1.9                                         | <b>1.25E-15</b>                          | -1.7                                         | <b>1.79E-20</b>                          | -1.6                                         | <b>3.30E-14</b>                          | -1.9                                         | <b>8.82E-18</b>                          |
