# Supplementary material for: Expression Profiling of a Genetic Animal Model of Depression Reveals Novel Molecular Pathways Underlying Depressive-Like Behaviours
Source: PubMed Central journal article supplement (PMC2935375; doi:10.1371/journal.pone.0012596), 2010-09-07
Supplement: pone.0012596.s003.pdf [file pone.0012596.s003.pdf]

| Affy ID    | Gene Name | Fold Change FSL vs FRL combined PFC | p-value FSL vs FRL combined PFC | Fold Change FSL vs FRL cohort 1 PFC | p-value FSL vs FRL cohort 1 PFC | Fold Change FSL vs FRL cohort 2 PFC | p-value FSL vs FRL cohort 2 PFC | Fold Change FSL vs FRL combined HIP | p-value FSL vs FRL combined HIP | Fold Change FSL vs FRL cohort 1 HIP | p-value FSL vs FRL cohort 1 HIP | Fold Change FSL vs FRL cohort 2 HIP | p-value FSL vs FRL cohort 2 HIP |
|------------|-----------|-------------------------------------|---------------------------------|-------------------------------------|---------------------------------|-------------------------------------|---------------------------------|-------------------------------------|---------------------------------|-------------------------------------|---------------------------------|-------------------------------------|---------------------------------|
| 1369809_at | Htr1a     | 1.3                                 | <b>2.6E-05</b>                  | 1.4                                 | <b>2.0E-04</b>                  | 1.3                                 | <b>1.1E-02</b>                  | 1.2                                 | <b>5.4E-05</b>                  | 1.2                                 | <b>1.5E-02</b>                  | 1.3                                 | <b>2.7E-04</b>                  |
| 1395089_at | Htr1a     | 1.2                                 | <b>6.5E-06</b>                  | 1.2                                 | <b>1.7E-04</b>                  | 1.2                                 | <b>2.0E-03</b>                  | 1.1                                 | <b>1.3E-02</b>                  | 1.0                                 | 9.1E-01                         | 1.3                                 | <b>7.5E-04</b>                  |
| 1376458_at | Htr1a     | 1.1                                 | <b>2.2E-03</b>                  | 1.1                                 | 6.3E-02                         | 1.1                                 | <b>7.9E-03</b>                  | 1.1                                 | 9.0E-02                         | 1.0                                 | 9.1E-01                         | 1.3                                 | <b>2.0E-02</b>                  |
| 1369124_at | Htr2a     | 1.2                                 | <b>2.7E-02</b>                  | 1.1                                 | 2.0E-01                         | 1.2                                 | 5.3E-02                         | 1.2                                 | <b>1.7E-03</b>                  | 1.2                                 | <b>9.9E-03</b>                  | 1.2                                 | <b>4.6E-02</b>                  |
| 1369125_at | Htr2a     | 1.2                                 | <b>7.8E-03</b>                  | 1.2                                 | 9.8E-02                         | 1.3                                 | <b>2.5E-02</b>                  | 1.4                                 | <b>4.2E-04</b>                  | 1.5                                 | <b>2.6E-03</b>                  | 1.3                                 | <b>3.0E-02</b>                  |
| 1394517_at | Chrm2     | 1.2                                 | <b>1.0E-06</b>                  | 1.3                                 | <b>1.1E-05</b>                  | 1.2                                 | <b>2.6E-03</b>                  | 1.1                                 | 9.2E-02                         | 1.0                                 | 7.5E-01                         | 1.2                                 | <b>3.5E-02</b>                  |
| 1369245_at | Chrm2     | 1.1                                 | <b>3.0E-02</b>                  | 1.1                                 | 1.5E-01                         | 1.1                                 | 8.8E-02                         | 1.1                                 | 1.5E-01                         | 1.0                                 | 6.4E-01                         | 1.2                                 | 1.1E-01                         |
| 1395429_at | Chrna7    | 1.1                                 | <b>1.0E-02</b>                  | 1.2                                 | <b>4.1E-02</b>                  | 1.1                                 | 9.5E-02                         | 1.1                                 | 1.1E-01                         | 1.2                                 | 1.1E-01                         | 1.1                                 | 5.2E-01                         |
| 1387419_at | Chrna7    | 1.2                                 | <b>2.3E-04</b>                  | 1.2                                 | <b>1.3E-02</b>                  | 1.2                                 | <b>2.3E-03</b>                  | 1.2                                 | <b>9.1E-05</b>                  | 1.2                                 | <b>1.6E-03</b>                  | 1.2                                 | <b>7.1E-03</b>                  |
| 1369818_at | Gabrb2    | 1.4                                 | <b>1.7E-04</b>                  | 1.3                                 | <b>1.5E-02</b>                  | 1.5                                 | <b>1.3E-03</b>                  | 1.1                                 | 3.7E-01                         | 1.0                                 | 9.7E-01                         | 1.2                                 | 2.1E-01                         |
| 1369903_at | Gabrb3    | 1.4                                 | <b>8.5E-06</b>                  | 1.3                                 | <b>1.5E-03</b>                  | 1.4                                 | <b>2.6E-04</b>                  | 1.3                                 | <b>2.9E-03</b>                  | 1.2                                 | 1.3E-01                         | 1.4                                 | <b>4.4E-03</b>                  |
| 1382132_at | Gabrb3    | 1.1                                 | <b>5.0E-04</b>                  | 1.1                                 | <b>2.7E-03</b>                  | 1.1                                 | <b>3.8E-02</b>                  | 1.0                                 | <b>2.8E-02</b>                  | 1.0                                 | 1.3E-01                         | 1.0                                 | 9.9E-02                         |
| 1378391_at | Gabrb3    | 1.1                                 | <b>2.3E-02</b>                  | 1.1                                 | 3.0E-01                         | 1.1                                 | <b>2.1E-02</b>                  | 1.1                                 | 5.1E-02                         | 1.0                                 | 4.9E-01                         | 1.1                                 | <b>3.3E-02</b>                  |
