# Supplementary material for: Expression Profiling of a Genetic Animal Model of Depression Reveals Novel Molecular Pathways Underlying Depressive-Like Behaviours
Source: PubMed Central journal article supplement (PMC2935375; doi:10.1371/journal.pone.0012596), 2010-09-07
Supplement: pone.0012596.s004.pdf [file pone.0012596.s004.pdf]

A

| GOTERM_BP_5                                            | Count | %   | P-Value | FDR  |
|--------------------------------------------------------|-------|-----|---------|------|
| synaptic vesicle transport                             | 15    | 1.1 | 0.000   | 0.1  |
| exocytosis                                             | 23    | 1.6 | 0.000   | 0.2  |
| synaptic transmission                                  | 58    | 4.1 | 0.000   | 0.4  |
| intracellular transport                                | 81    | 5.7 | 0.000   | 0.4  |
| secretory pathway                                      | 41    | 2.9 | 0.000   | 0.5  |
| regulation of neurotransmitter levels                  | 27    | 1.9 | 0.000   | 0.5  |
| secretion by cell                                      | 46    | 3.2 | 0.000   | 0.6  |
| neuron development                                     | 36    | 2.5 | 0.000   | 0.6  |
| catecholamine metabolic process                        | 11    | 0.8 | 0.001   | 1.5  |
| microtubule-based process                              | 30    | 2.1 | 0.001   | 1.9  |
| cellular morphogenesis during differentiation          | 30    | 2.1 | 0.002   | 2.6  |
| neuron differentiation                                 | 42    | 3   | 0.002   | 2.8  |
| neurite morphogenesis                                  | 28    | 2   | 0.002   | 3.3  |
| cell part morphogenesis                                | 36    | 2.5 | 0.002   | 4.2  |
| cell projection organization and biogenesis            | 36    | 2.5 | 0.002   | 4.2  |
| cell projection morphogenesis                          | 36    | 2.5 | 0.002   | 4.2  |
| monosaccharide catabolic process                       | 15    | 1.1 | 0.003   | 4.9  |
| cell redox homeostasis                                 | 11    | 0.8 | 0.003   | 5.1  |
| protein transport                                      | 67    | 4.7 | 0.003   | 5.3  |
| cytoskeleton-dependent intracellular transport         | 18    | 1.3 | 0.004   | 6.3  |
| microtubule-based movement                             | 16    | 1.1 | 0.004   | 6.7  |
| neurogenesis                                           | 49    | 3.4 | 0.004   | 7.5  |
| dopamine metabolic process                             | 8     | 0.6 | 0.006   | 10.2 |
| modification-dependent macromolecule catabolic process | 21    | 1.5 | 0.007   | 10.8 |
| cellular carbohydrate catabolic process                | 17    | 1.2 | 0.009   | 14.3 |
| forebrain development                                  | 11    | 0.8 | 0.011   | 17.6 |
| vesicle coating                                        | 4     | 0.3 | 0.011   | 18   |
| cellular protein catabolic process                     | 21    | 1.5 | 0.012   | 18.8 |
| regulation of neuronal synaptic plasticity             | 9     | 0.6 | 0.014   | 21.8 |
| regulated secretory pathway                            | 17    | 1.2 | 0.018   | 27.8 |
| endocytosis                                            | 23    | 1.6 | 0.019   | 28.5 |
| regulation of exocytosis                               | 8     | 0.6 | 0.020   | 29.4 |
| mRNA metabolic process                                 | 25    | 1.8 | 0.020   | 30   |
| protein folding                                        | 24    | 1.7 | 0.022   | 31.8 |
| synaptic vesicle exocytosis                            | 7     | 0.5 | 0.023   | 33.9 |
| biogenic amine metabolic process                       | 14    | 1   | 0.025   | 35.6 |
| neurotransmitter secretion                             | 15    | 1.1 | 0.026   | 37   |
| regulation of synapse structure and activity           | 12    | 0.8 | 0.026   | 37.2 |
| dendrite development                                   | 8     | 0.6 | 0.027   | 38   |
| tricarboxylic acid cycle                               | 6     | 0.4 | 0.027   | 38.3 |
| membrane budding                                       | 4     | 0.3 | 0.028   | 38.8 |
| dopamine biosynthetic process                          | 4     | 0.3 | 0.028   | 38.8 |
| central nervous system development                     | 30    | 2.1 | 0.028   | 38.8 |
| cell morphogenesis                                     | 53    | 3.7 | 0.028   | 39.5 |
| actin filament-based process                           | 25    | 1.8 | 0.029   | 40.2 |
| protein catabolic process                              | 24    | 1.7 | 0.033   | 44.5 |
| amine biosynthetic process                             | 14    | 1   | 0.035   | 46.8 |
| ER to Golgi vesicle-mediated transport                 | 10    | 0.7 | 0.037   | 48.4 |
| protein polymerization                                 | 10    | 0.7 | 0.037   | 48.4 |
| synaptogenesis                                         | 7     | 0.5 | 0.038   | 49.8 |
| regulation of RNA metabolic process                    | 6     | 0.4 | 0.040   | 50.9 |
| positive regulation of protein catabolic process       | 3     | 0.2 | 0.042   | 52.6 |
| acetyl-CoA metabolic process                           | 8     | 0.6 | 0.046   | 56.6 |
| translational elongation                               | 6     | 0.4 | 0.047   | 57.2 |
| hexose metabolic process                               | 22    | 1.5 | 0.048   | 58   |

B

| GOTERM_BP_5                                                           | Count | %   | P-Value | FDR  |
|-----------------------------------------------------------------------|-------|-----|---------|------|
| modification-dependent macromolecule catabolic process                | 52    | 2   | 0.000   | 0    |
| cellular protein catabolic process                                    | 52    | 2   | 0.000   | 0    |
| intracellular transport                                               | 156   | 6   | 0.000   | 0    |
| protein catabolic process                                             | 58    | 2.2 | 0.000   | 0    |
| protein transport                                                     | 124   | 4.8 | 0.000   | 0    |
| synaptic vesicle transport                                            | 19    | 0.7 | 0.000   | 0.5  |
| cellular carbohydrate catabolic process                               | 30    | 1.2 | 0.000   | 0.5  |
| acetyl-CoA metabolic process                                          | 16    | 0.6 | 0.000   | 0.8  |
| cell redox homeostasis                                                | 17    | 0.7 | 0.000   | 0.8  |
| cell part morphogenesis                                               | 60    | 2.3 | 0.000   | 0.8  |
| cell projection morphogenesis                                         | 60    | 2.3 | 0.000   | 0.8  |
| cell projection organization and biogenesis                           | 60    | 2.3 | 0.000   | 0.8  |
| intracellular protein transport                                       | 87    | 3.4 | 0.000   | 0.9  |
| secretory pathway                                                     | 62    | 2.4 | 0.001   | 1.4  |
| exocytosis                                                            | 31    | 1.2 | 0.001   | 1.7  |
| monosaccharide catabolic process                                      | 23    | 0.9 | 0.001   | 1.8  |
| Golgi vesicle transport                                               | 28    | 1.1 | 0.001   | 2.4  |
| phosphorylation                                                       | 128   | 4.9 | 0.002   | 3.6  |
| ER to Golgi vesicle-mediated transport                                | 18    | 0.7 | 0.002   | 4    |
| cytoskeleton-dependent intracellular transport                        | 27    | 1   | 0.004   | 5.9  |
| G1/S transition of mitotic cell cycle                                 | 15    | 0.6 | 0.004   | 6    |
| protein depolymerization                                              | 13    | 0.5 | 0.004   | 6.4  |
| interphase of mitotic cell cycle                                      | 23    | 0.9 | 0.004   | 6.7  |
| protein modification process                                          | 223   | 8.6 | 0.005   | 7.6  |
| interphase                                                            | 23    | 0.9 | 0.005   | 7.9  |
| synaptic transmission                                                 | 85    | 3.3 | 0.006   | 9.5  |
| regulation of cytoskeleton organization and biogenesis                | 14    | 0.5 | 0.006   | 10.2 |
| regulation of organelle organization and biogenesis                   | 14    | 0.5 | 0.006   | 10.2 |
| neuron differentiation                                                | 64    | 2.5 | 0.006   | 10.5 |
| microtubule-based movement                                            | 23    | 0.9 | 0.007   | 10.8 |
| microtubule-based process                                             | 43    | 1.7 | 0.007   | 11.2 |
| secretion by cell                                                     | 66    | 2.5 | 0.007   | 11.4 |
| neuron development                                                    | 50    | 1.9 | 0.007   | 11.7 |
| cell morphogenesis                                                    | 93    | 3.6 | 0.008   | 13.1 |
| nerve-nerve synaptic transmission                                     | 16    | 0.6 | 0.008   | 13.3 |
| catecholamine metabolic process                                       | 13    | 0.5 | 0.008   | 13.6 |
| protein folding                                                       | 40    | 1.5 | 0.009   | 14.2 |
| tricarboxylic acid cycle                                              | 9     | 0.3 | 0.009   | 14.7 |
| coenzyme catabolic process                                            | 10    | 0.4 | 0.009   | 15   |
| cellular morphogenesis during differentiation                         | 43    | 1.7 | 0.010   | 16.2 |
| regulation of neurotransmitter levels                                 | 35    | 1.3 | 0.010   | 16.8 |
| central nervous system development                                    | 51    | 2   | 0.011   | 17.2 |
| neurite morphogenesis                                                 | 40    | 1.5 | 0.012   | 18.7 |
| mitochondrial transport                                               | 14    | 0.5 | 0.012   | 19.1 |
| protein polymerization                                                | 16    | 0.6 | 0.014   | 22.5 |
| dopamine metabolic process                                            | 10    | 0.4 | 0.016   | 25.1 |
| regulation of RNA metabolic process                                   | 9     | 0.3 | 0.017   | 26   |
| mRNA metabolic process                                                | 40    | 1.5 | 0.019   | 28.1 |
| small GTPase mediated signal transduction                             | 69    | 2.7 | 0.019   | 28.7 |
| regulation of actin polymerization and/or depolymerization            | 11    | 0.4 | 0.020   | 29.3 |
| negative regulation of cellular component organization and biogenesis | 11    | 0.4 | 0.020   | 29.3 |
| aerobic respiration                                                   | 10    | 0.4 | 0.021   | 31.3 |
| translational elongation                                              | 9     | 0.3 | 0.022   | 32.9 |
| forebrain development                                                 | 15    | 0.6 | 0.023   | 33.5 |
| vesicle docking                                                       | 9     | 0.3 | 0.029   | 40.4 |
| Wnt receptor signaling pathway                                        | 22    | 0.8 | 0.029   | 40.6 |
| biogenic amine metabolic process                                      | 21    | 0.8 | 0.029   | 40.8 |
| RNA transport                                                         | 11    | 0.4 | 0.030   | 41.6 |
| nucleic acid transport                                                | 11    | 0.4 | 0.030   | 41.6 |
| protein targeting to mitochondrion                                    | 8     | 0.3 | 0.031   | 42.5 |
| actin filament depolymerization                                       | 7     | 0.3 | 0.032   | 43.7 |
| foregut morphogenesis                                                 | 4     | 0.2 | 0.032   | 43.7 |
| synaptic vesicle exocytosis                                           | 9     | 0.3 | 0.046   | 56.3 |
| actin filament-based process                                          | 39    | 1.5 | 0.047   | 56.8 |
