# Supplementary material for: Expression Profiling of a Genetic Animal Model of Depression Reveals Novel Molecular Pathways Underlying Depressive-Like Behaviours
Source: PubMed Central journal article supplement (PMC2935375; doi:10.1371/journal.pone.0012596), 2010-09-07
Supplement: pone.0012596.s005.pdf [file pone.0012596.s005.pdf]

| Gene                 | Forward Primer Sequence  | Reverse Primer Sequence  | Probe Sequence (5'FAM, 3'TAMRA) |
|----------------------|--------------------------|--------------------------|---------------------------------|
| TMEM176A             | TGTGCTGGTACGTGTTGCTAGA   | GTCAGGGAACCAGAGAACATTCTG | CCATGACGCAGGTGACCTAACCAGTCC     |
| FAM111A              | TGACACTCAAGTCTTGGTCCTTTG | CCCAGCAACATTCTTCAGC      | AATCTCATCAAAAACAGAGTCAAGGAG     |
| CA3                  | GCTTGCCGGGACTATTGGAC     | AGCTCACTGTCATGGGCTCTTTC  | AGTAGCAGCCACACAATGCACTCCTCG     |
| Rnase4               | TCACGAAGGCATAGTGAGGGTC   | ACAGGCAATGACAACCTCGCC    | CCTACAGTTGTGGGGCACAGAGCTCCC     |
| RGD1565398_predicted | GGTCAAGGCCAGCAACAGC      | CGTCGTTGATGAAATCCATGC    | TCGAGCGTCTCTTCAGTCCAGCAGAA      |
| 1392736_at           | GGCCTCCTGGTTAGCTGTGT     | GGGATGGTGAGAAAACAAGAGAA  | AAATGCTGTTTGCCCTCTTCGGTAGACTCT  |
| RICS_predicted       | CCTATGTGCCCTCTGGCTTTG    | GGATGTGGCAAGGACAGCTC     | ATCCACAGAGCAGGACATACGCCACAG     |
| ILF3                 | CCGAAACATGCTGGGAAGAAG    | GGTTGTAAGGTTGCTGCTGGC    | ACCCTCCTACAGCTCGGGCTACCAGTC     |
| Pex11b               | GGCTTCTTCCCTGGGTCTGC     | GAAGAGGCCAGACACAGCATC    | TCAGACAGACGCTCCTCTGGTCTTCCA     |
| mss4                 | GAAGAAGCCGGATCTGGTGG     | AAAGCCACGTTCTCAAAGATG    | TCCTCGAGGACATCACCATCAGGATTG     |
| 1383058_at           | TCAAGGTTGGGCTCCGATTC     | AGCGGTGTGGTGTCTCTTGG     | CTGCATCTTGGGATCTAGGCCCGTGG      |
| AA859982             | CAGAAGCATACTGCTTGTCCAATG | GGTCATGCCTGCCTTCTGTG     | TGTGCATGACTAAACAGTGCCATCTAGC    |
| AI137236             | TGTTAGGTGTGCACCAGCAG     | GGTGGAGGCGTCTAGATGG      | TTTGGAGTTCAAACCTCTTTGGGTGCA     |
| Chrna7               | CTTGTCAGCACAAGCCTCGG     | GGCCTCGGAAGCCAATGTAG     | CAGTGTGGAGCTGAGTGCAGGTGCTG      |
| Chrm2                | CCTACCCAGTTAAGCGGACCAC   | TGCCAGAAGAGAATGGCTGG     | CTGCGTGGGTCTTTCTTCATCCTCT       |
| Htr1a                | TGGCTCTGGTCTCGCTTTC      | GGATTGAGCAGGGAGTTGGAG    | TTAATTATGGCACCCAACAACGCAGGC     |
| Htr2a                | TGACCTCAGCACTCGAGCCA     | TGTGGATGGACCGTTGGAAG     | AGCCTCCTCAGCTTCCCTCCCTCAGAG     |
| Gabbr2               | GCCTCCCATGAGAAGCAAGG     | GGACCACAGGATAGGCCAGC     | TCCAAGTCCACATCAGGCATCAAGCTGT    |
| Gabbr3               | CATGGGCGGTACATGGGA       | GCGAAGACCTCCTCCGTAGG     | ACAGAAGCATCCCGCACAGAAGACG       |
| GAPDH                | CAAGGTCATCCATGACAACCTTTG | GGGCCATCCACAGTCTTCTG     | ACCACAGTCCATGCCATCACTGCCA       |
| PPIA                 | TTATCTGCACTGCCAAGACTGA   | CCACAATGCTCATGCCTTCTTTC  | CCAAAGACCACATGCTTGCCATCCA       |
| HPRT                 | TTGCTCGAGATGTCATGAAGGAG  | ATGTAATCCAGCAGGTCAGCAAAG | ATCACATTGTGGCCCTCTGTGTGCTG      |
| ACTB                 | GAGCTATGAGCTGCCTGACG     | AGTTTCATGGATGCCACAGGA    | CATCACTATCGGCAATGAGCGGTTCC      |
| MRFAP1               | CATCTGGGACTGTGGATGGG     | CCAACAAACTCATCAGGCAGG    | ACACGGCTAGGACTGATGACCTGGGAG     |
| RGD1310230           | CTTGCAGAATGCAGGGAAGG     | CAAAGGAGCGTGTGTAGGCG     | AGAGTGGAGAGCTGACCTGTGCTGAC      |
| PHPT1_predicted      | TTCCTGATGTGGACATTGATTGAG | TTTCTTGCCTCCCTCGC        | TTCGAGTCCACTTAGCAGAGCCTCCG      |
| CDIPT                | CAAAGGTGGTTGGCTCCTCC     | TGGCCAGCCAGGACATAGAG     | ATTCCAGTGACCTCAGAGAGGCCTCGA     |
